1      **Access to HIV-prevention in female sex workers in Ukraine between 2009 and 2017:**  
2                                      **coverage, barriers and facilitators**

3      Natasha Blumer<sup>1#a,2</sup>, Lisa M. Pfadenhauer<sup>1,2</sup>, Jacob Burns<sup>1,2</sup>

4  
5      <sup>1</sup> Institute for Medical Information Processing, Biometry and Epidemiology - IBE

6      Ludwig-Maximilians-Universität München, Munich, Germany

7      <sup>2</sup> Pettenkofer School of Public Health Munich, Munich, Germany

8  
9      <sup>#a</sup> Current address : Institute for Medical Information Processing, Biometry and Epidemiology

10     - IBE, Chair of Public Health and Health Services Research Pettenkofer School of Public

11     Health (PSPH), LMU Munich, Marchioninstrasse 17, 81377 Munich, Germany

12     **Abstract**

13             The provision of comprehensive prevention services is vital for reducing the high  
14     burden of HIV amongst Ukrainian female sex workers (FSWs). To identify barriers and  
15     facilitators that influence access to HIV prevention amongst this population between 2009  
16     and 2017, we developed a literature-informed conceptual framework and conducted a  
17     document analysis to identify the components of the Ukrainian prevention package (PP).  
18     Using the Integrated Bio Behavioural Surveillance Surveys, we then conducted descriptive  
19     analyses to explore PP coverage from 2009 to 2017 and the influence of factors, identified by  
20     our conceptual framework. After increasing over four years, a drop in PP coverage was  
21     observed from 2013 onwards. Being a client of a non-governmental organisation, street and  
22     highway solicitation, non-condom use, and knowledge of HIV may influence access to HIV  
23     prevention in the Ukrainian context. Future interventions should consider barriers and  
24     facilitators to HIV prevention and the multiple structural levels on which they operate.

25     **Keywords:** HIV, health services accessibility, sex worker, Ukraine, cross sectional survey

26

## 27 Introduction

28           Although the global HIV incidence rate has decreased, Ukraine has developed one of  
29 the most severe HIV epidemics in Europe and Central Asia [1]. As in most countries, the HIV  
30 epidemic in Ukraine is concentrated amongst populations that are at heightened risk of  
31 contraction, designated 'key populations'. These include people who inject drugs, men who  
32 have sex with men, transgender people, incarcerated persons and sex workers (SWs) [2-4].

33 Globally, female sex workers (FSWs) bear a disproportionately high burden of the HIV  
34 pandemic, with a global prevalence of over 10% [5]. FSWs are 13.5 times more likely to  
35 contract HIV than of women of the same reproductive age [6]. In Ukraine, the annual  
36 incidence rate lies at 0.56 per 1000 uninfected SWs and the prevalence at 5.2% within an  
37 estimated population of 80.000 SWs [3]. An array of determinants increase the vulnerability  
38 of a FSW to HIV, including gender-based violence (GBV) [7, 8], poverty [9, 10], multiple  
39 sexual partners [11], criminalisation [12-15], stigma [16, 17] and substance abuse [18].  
40 Recent literature has posited that determinants of HIV operate on different structural levels,  
41 ranging from the macrostructural to the individual level [13, 14].

42 Although a multitude of prevention interventions have been designed to reduce the impact of  
43 HIV amongst key populations, it has been established that no single prevention intervention  
44 is sufficient to contain the spread of the disease and that a multi-pronged, multi-level  
45 approach is necessary [19-21]. In 2014, the World Health Organisation (WHO) published  
46 guidelines consolidating all existing recommendations relevant to the prevention of HIV  
47 amongst key populations, including SWs. These guidelines outline the components of a  
48 comprehensive, evidence-based package of interventions, which has been found to be  
49 acceptable and effective for the global SW community. The package has two parts: essential  
50 health care sector interventions and essential strategies for an enabling environment. Health  
51 care interventions include components such as comprehensive condom and lubricant  
52 provision and behavioural interventions (e.g. consultation with social workers), whilst  
53 strategies addressing community empowerment and addressing violence fall beneath the

54 enabling environment section [4]. As one of the five prevention pillars, the United Nations  
55 General Assembly prevention targets emphasised the importance of this comprehensive  
56 prevention package (PP), by urging countries to ensure that 90% of people at risk of HIV  
57 infection have access to the PP by 2020 [22]. The Alliance of Public Health (Alliance) has  
58 been distributing HIV prevention amongst key populations in Ukraine since 2003,, which was  
59 first coined the PP in 2007, has since been scaled up countrywide [23].

60 Despite these efforts, only 46% and 48% of Ukrainian SWs accessed the PP in 2015 and  
61 2017 respectively [24, 25]. Recent literature has identified that FSWs encounter barriers on  
62 multiple structural levels, which impede their access to HIV prevention services [21, 26]. In  
63 order to improve the intervention and its implementation in Ukraine, further investigation is  
64 necessary to determine the factors that hinder FSWs from accessing the PP.

65 The aim of this study was to therefore explore which factors influenced the access that  
66 Ukrainian FSWs had to the PP between 2009 and 2017. More specifically, our four research  
67 objectives were 1) to develop a conceptual framework illustrating the factors that influence  
68 FSWs access to prevention and the structural levels they operate on 2) to identify which  
69 components were included in the Ukrainian PP for SWs, 3) to measure the coverage of the  
70 PP in Ukraine amongst the FSW population and finally, 4) to describe and explore the factors  
71 associated with the access of Ukrainian FSW to the PP over this nine-year period.

## 72 **Method**

73 We undertook multiple steps to address our four research objectives, as outlined in  
74 Fig 1. We began by developing a conceptual framework, informed by a literature review  
75 (objective 1). We then conducted a document analysis, which served to describe the  
76 Ukrainian PP and its components (objective 2). The questionnaires from five Ukrainian  
77 Integrated Bio Behavioural Surveillance Surveys (IBBS) were then reviewed to identify item  
78 that corresponded to both the factors identified in the conceptual framework and the  
79 components identified in the document analysis. These then served as our independent

80 variables and outcome variables, respectively and were used to conduct exploratory  
81 analyses. This included calculating descriptive statistics to measure the coverage of the PP  
82 amongst the Ukrainian FSW population (objective 3) and a descriptive longitudinal  
83 comparison between FSWs that did and did not access prevention, to explore which factors  
84 influenced access to PP between 2009 and 2017 (objective 4). As no information about the  
85 gender of Ukrainian SWs is available in the IBBS data prior to 2015 and that in 2017, 97.72%  
86 of Ukrainian SWs were female (2.14% male and 0.14% transgender), we have referred to  
87 SWs as FSWs when referring to IBBS data, unless stated otherwise.

88

89 **Fig 1. Flowchart of methodological approach.**

90

## 91 **Conceptual Framework**

92 In an iterative process, NB thematically grouped specific factors associated with access to  
93 HIV prevention, which were identified in a literature review. The literature review method,  
94 corresponding protocol, and results are available in the supporting information, S1.  
95 Uncertainties about attributing factors to a certain thematic cluster were discussed with JB  
96 and LMP on an ongoing basis. To structure these thematic clusters, we adopted the  
97 framework structure developed by Shannon and colleagues, which visualises the  
98 determinants of HIV for the global population of FSWs. This framework identifies six  
99 structural levels that HIV determinants operate on, including the macrostructural, sex worker  
100 community organisation, work environment, sexual networks and patterning, sex worker and  
101 client individual level [13, 14]. As our literature review identified that factors associated with  
102 the access to HIV prevention also operate on different structural levels, we considered the  
103 structure of this framework appropriate and populated it with our thematic clusters  
104 accordingly (Table in S2 Table).

## 105 **Document Analysis and Description of the Ukrainian PP**

106 Our second research objective aimed to identify components offered as part of the  
107 Ukrainian PP between 2008 and 2017. To do so, we conducted a document analysis of all  
108 annual general reports published by Alliance over this time period [24, 25, 27-34]. With  
109 substantial financial support by of the Global Fund to Fight AIDS, Tuberculosis and Malaria  
110 (TGF), Alliance has been responsible for the distribution of HIV prevention amongst SWs in  
111 Ukraine since 2004, and each report provides a detailed list of components included in the  
112 PP [35]. These components were extracted from the English version of each annual report.  
113 After extraction, we grouped the components of similar nature into categories to gain a  
114 clearer picture of the composition of the PP over the years. For a detailed list of the  
115 categories and associated components, see table in S3 Table.

## 116 **Review of IBBS questionnaires and variable selection**

117 We reviewed the questionnaires of five Integrated Bio Behavioural Surveillance  
118 Surveys (IBBS) to identify items that corresponded to both our outcome and independent  
119 variables, which were drawn from the results of the conceptual framework and document  
120 review, respectively. The IBBS are cross-sectional studies that were administered amongst  
121 Ukrainian SWs in 15 cities in 2009, 25 cities in 2011, 27 cities in 2013 and 2015 and 32 cities  
122 in 2017. The IBBS were developed, piloted and administrated by Alliance under the financial  
123 support of the TGF in 2009, 2011 and 2013 and then from the The U.S. Centers for Disease  
124 Control and Prevention (CDC) in 2015 and 2017. The Public Health Centre (PHC) of the  
125 Ukrainian Ministry of Health are now the holders of the data. Ethical approval was granted by  
126 the Institutional Review Board (IRB) at the Ukrainian Institute on Public Health Policy (Kiev,  
127 Ukraine) and CDC. The surveys were administered as face-to-face interviews lasting  
128 approximately thirty minutes. The interview was followed by a voluntary rapid HIV tests,  
129 details of rapid tests can be found in the Alliance analytic reports [25, 28, 30, 32, 34].

130 Participants were considered eligible if they were fourteen or older, had received money,  
131 goods or services in exchange for sex within the last six months and consented to participate  
132 in the study. Three sampling strategies were employed for recruiting participants:  
133 respondent-driven-sampling (RDS), time-location-sampling (TLS) and key-informant  
134 sampling was employed in 2013, no follow up was conducted. Recruitment continued until  
135 sample size was reached. Sample size was calculated for each study site using the specific  
136 HIV prevalence rate as determined by the previous IBBS result. Further details about the  
137 study design of each year can be found in the analytic reports of Alliance [25, 28, 30, 32, 34].  
138 All five IBBS surveys were translated from Ukrainian into English by an associate professor  
139 of Slavic languages at the Donetsk National Technical University.

## 140 **Independent Variables**

141 To identify our independent variables, namely, *factors associated with access to HIV*  
142 *prevention*, we drew upon our conceptual framework (objective 1) and then screened each  
143 IBBS questionnaire for a corresponding item. The single most fitting item was selected for  
144 each independent variable.

145 We support the emphasis that Shannon and colleagues place upon factors that operate at  
146 the macrostructural level when designing prevention policies and schemas. As all IBBS  
147 questionnaires measure individual behaviour, we were unable to extract items operating on  
148 the macrostructural level, and hence, resorted to designating the most fitting item at the  
149 individual level to these macrostructural factors. The exact item used for each independent  
150 variable can be found in the table in S5 table.

## 151 **Outcome Variable**

152 *Receipt of the Ukrainian PP* was our outcome of interest; hence we drew upon the  
153 findings of our document analysis. As there is no universally accepted way to measure PP

154 receipt, we created two definitions, including “basic PP receipt” and “extended PP receipt”.  
155 We initially used Alliance’s definition for basic PP receipt which consists of “the receipt of at  
156 least one consultation from a social worker and the receipt of at least one male condom over  
157 a six month period” [36]. However, due to limitations in the IBBS data, we altered this to “the  
158 receipt of at least one male condom and any form of HIV testing over a 12-month period”.

159 For extended PP receipt, we adopted the Joint United Nations Programme on HIV/AIDS’  
160 (UNAIDS) [37] definition. According to UNAIDS, PP receipt is defined as, “access to at least  
161 two HIV prevention interventions within the last three months”. As the time frame referenced  
162 in many IBBS question was twelve months, we adapted this definition by increasing the  
163 three-month period to twelve months. Thus, we defined extended PP receipt as, “access to  
164 at least two HIV prevention interventions within the last twelve months”. The number and  
165 specific type of prevention services included in each year’s extended PP, alongside the  
166 corresponding IBBS item, can be found in the table in S4 Table.

167

## 168 **Exploratory Analyses: PP Coverage and Descriptive**

### 169 **Longitudinal Group Comparison**

170 We conducted descriptive statistics to measure the coverage of the basic and  
171 extended PP receipt between 2009 and 2017 (objective 3). We did so by calculating the  
172 proportion of FSWs that received the PP per year according to the definition for basic PP  
173 receipt and extended PP receipt. These results enabled us to undertake a descriptive  
174 longitudinal group comparison to compare the FSWs who did and did not receive the PP,  
175 with regard to the various independent variables (objective 4). Specifically, we calculated  
176 proportions for binary variables and means for continuous variables, stratified by those who  
177 received the basic PP and the extended PP and those who did not (table 3). All variables  
178 were screened for missing data before undergoing descriptive analyses. For all but one

179 variable assessed, the proportion of missing data was low, ranging from 0% to 6.7%. For the  
180 item regarding HIV status, a large proportion of the data, 54.3% was missing. We excluded  
181 missing data from the analysis. All analyses were conducted using the statistical software R  
182 (3.6.0) [38].

## 183 **Results**

### 184 **Conceptual Framework (objective 1)**

185 Many factors associated with access to HIV prevention were presented in multiple  
186 studies, identified in our literature review. As these factors were largely aligned, we clustered  
187 factors with similar themes to better structure our conceptual framework. For example, three  
188 specific factors found to influence access to HIV prevention – knowledge of where to access  
189 prevention [9], knowledge of HIV transmission routes [39-41] and the self-perception of being  
190 at high risk of HIV infection [42] – were grouped into one broader thematic cluster,  
191 knowledge of HIV. After discussing the conceptual framework with staff members from the  
192 PHC, one thematic cluster, sex worker- family was excluded from the conceptual framework,  
193 as the specific factors were applicable to a generalised epidemic (HIV prevalence of  $\geq 1\%$   
194 amongst the general population) and were not applicable in the Ukrainian context, where the  
195 epidemic is classified as a concentrated or mixed epidemic [43]. Our conceptual framework  
196 illustrates that most thematic clusters which influence access to HIV prevention operate at  
197 the macrostructural level, as seen in Fig 2.

198

199 **Fig 2. Conceptual framework of factors and structural levels influencing access to HIV**  
200 **prevention.**

201



## 202 Document Analysis and Description of the Ukrainian PP

### 203 (objective 2)

204 A total of 32 categories describing prevention components emerged from the  
205 document analysis of the Alliance annual general reports from 2008 to 2017 (see Table1).  
206 Many components included in the PPs could be grouped into broader categories. For  
207 example, testing for chlamydia, assisted testing for syphilis and examination for sexually  
208 transmitted diseases (STI) were coded as the overarching category, 'any form of STI testing'.  
209 A list of specific components within each overarching prevention category can be found in S3  
210 in the supporting information.

211 The number of components included in the Ukrainian PP increased from 2008 until 2013,  
212 when the highest number of components (n=24) was included in both 2012 and 2013. A  
213 steep drop was observed in 2014, with only seven components included. Between 2015 and  
214 2017, eleven components were included in the PP.

215 The four prevention components 'any form of social worker counselling', 'male condoms',  
216 'awareness raising materials' and 'HIV testing and counselling' were the most commonly  
217 delivered components in the Ukrainian PP across all years. Lubricants, 'any form of STI  
218 testing' and 'referrals to relevant specialists' were also consistently included in the prevention  
219 package in all years, except for 2014. 'Overdose prevention' was only included once in 2012,  
220 while 'online counselling', 'training about safe behaviour', 'case management', 'humanitarian  
221 aid' and 'tea and meals' were only included twice. The level of coverage of each component  
222 may vary based on region.

223

**Table 1: Overview of components of the PP provided by Alliance from 2008 to 2017**

224

| Component                                           | Year | 2008 | 2009 | 2010 | 2011 | 2012 | 2013 | 2014 | 2015 | 2016 | 2017 | Sum |
|-----------------------------------------------------|------|------|------|------|------|------|------|------|------|------|------|-----|
| Any form of counselling from a social worker        |      |      |      |      |      |      |      |      |      |      |      | 10  |
| Male condoms                                        |      |      |      |      |      |      |      |      |      |      |      | 10  |
| Awareness raising and educational material          |      |      |      |      |      |      |      |      |      |      |      | 10  |
| Any form of HIV testing and counselling             |      |      |      |      |      |      |      |      |      |      |      | 10  |
| Lubricants                                          |      |      |      |      |      |      |      |      |      |      |      | 9   |
| Any form of STI testing                             |      |      |      |      |      |      |      |      |      |      |      | 9   |
| Referrals to relevant specialists                   |      |      |      |      |      |      |      |      |      |      |      | 9   |
| Some form of peer counselling                       |      |      |      |      |      |      |      |      |      |      |      | 8   |
| Any form of specialist medical or legal counselling |      |      |      |      |      |      |      |      |      |      |      | 6   |
| Any form of hepatitis B testing                     |      |      |      |      |      |      |      |      |      |      |      | 6   |
| Antiseptics                                         |      |      |      |      |      |      |      |      |      |      |      | 6   |
| Pregnancy tests                                     |      |      |      |      |      |      |      |      |      |      |      | 6   |
| Organisation of leisure activities                  |      |      |      |      |      |      |      |      |      |      |      | 5   |
| Childcare and services                              |      |      |      |      |      |      |      |      |      |      |      | 5   |
| Cosmetologist and hairdresser services              |      |      |      |      |      |      |      |      |      |      |      | 5   |
| Any form of professional/ skilled work training     |      |      |      |      |      |      |      |      |      |      |      | 5   |
| Participation in group work                         |      |      |      |      |      |      |      |      |      |      |      | 4   |
| Female condoms and training for usage               |      |      |      |      |      |      |      |      |      |      |      | 4   |
| Some form of TB screening                           |      |      |      |      |      |      |      |      |      |      |      | 4   |
| Counteracting violence                              |      |      |      |      |      |      |      |      |      |      |      | 4   |
| Any form of hepatitis C testing                     |      |      |      |      |      |      |      |      |      |      |      | 3   |
| Referral to opioid substitution therapy (OST)       |      |      |      |      |      |      |      |      |      |      |      | 3   |
| Syringe exchange and/or delivery                    |      |      |      |      |      |      |      |      |      |      |      | 3   |
| Distribution of general medication                  |      |      |      |      |      |      |      |      |      |      |      | 3   |
| Basic household services                            |      |      |      |      |      |      |      |      |      |      |      | 3   |
| Intimate hygiene items                              |      |      |      |      |      |      |      |      |      |      |      | 3   |
| Online counselling                                  |      |      |      |      |      |      |      |      |      |      |      | 2   |
| Humanitarian aid                                    |      |      |      |      |      |      |      |      |      |      |      | 2   |
| Tea and meals                                       |      |      |      |      |      |      |      |      |      |      |      | 2   |
| Training about safe behaviour                       |      |      |      |      |      |      |      |      |      |      |      | 2   |
| Case Management                                     |      |      |      |      |      |      |      |      |      |      |      | 2   |
| Overdose prevention                                 |      |      |      |      |      |      |      |      |      |      |      | 1   |
| Total components per year                           |      | 10   | 21   | 22   | 23   | 24   | 24   | 7    | 11   | 11   | 11   |     |

225

## 226 Results of exploratory analysis of IBBS

227 26.79 % of FSWs included in the overall study sample were recruited in the West of  
 228 Ukraine, 20.06% in the South, 22.74% in the East and 30.41% in Central Ukraine. The  
 229 average age was 28.52 years, 27.58% of the sample was living with a partner and 23.63 %  
 230 had obtained tertiary education (table 2). In 2015, 99.12% of participants were female and  
 231 0.88% were male. In 2017, 97.72 % of participants were female, 2.14% male and 0.13%

232 transgender. No data about gender was available for 2009,2011 and 2013.

233 **Table 2: Demographic characteristics of participants in IBBS**

|                                                                                       | <b>Total<br/>N (%)</b> | <b>2009<br/>N (%)</b> | <b>2011<br/>N (%)</b> | <b>2013<br/>N (%)</b> | <b>2015<br/>N (%)</b> | <b>2017<br/>N (%)</b> |
|---------------------------------------------------------------------------------------|------------------------|-----------------------|-----------------------|-----------------------|-----------------------|-----------------------|
| <b>Participants</b>                                                                   | -                      | N = 2278              | N = 5023              | N = 4806              | N = 4300              | N = 5043              |
| <b>Mean age (range)</b>                                                               | 28.52<br>(14-62)       | 27.38<br>(14-55)      | 27.65<br>(14-53)      | 28.51<br>(14-62)      | 28.87<br>(15-61)      | 29.63<br>(15-61)      |
| <b>Gender</b>                                                                         |                        |                       |                       |                       |                       |                       |
| <b>Female</b>                                                                         | N/A                    | -                     | -                     | -                     | 99.12                 | 4928<br>(97.72)       |
| <b>Male</b>                                                                           | N/A                    | -                     | -                     | -                     | 0.88                  | 108<br>(2.14)         |
| <b>Transgender</b>                                                                    | N/A                    | -                     | -                     | -                     | -                     | 7 (0.14)              |
| <b>Region of Ukraine</b>                                                              |                        |                       |                       |                       |                       |                       |
| <b>Western</b>                                                                        | 5747<br>(26.79)        | 703<br>(30.86)        | 1250<br>(24.89)       | 1000<br>(20.81)       | 1200<br>(27.91)       | 1594<br>(31.61)       |
| <b>Southern</b>                                                                       | 4303<br>(20.06)        | 150<br>(6.58)         | 1103<br>(21.96)       | 1350<br>(28.09)       | 800(18.6)             | 900<br>(17.84)        |
| <b>Eastern</b>                                                                        | 4877<br>(22.74)        | 462<br>(20.28)        | 1260<br>(25.08)       | 1356<br>(28.21)       | 900<br>(20.93)        | 899<br>(17.83)        |
| <b>Central</b>                                                                        | 6523<br>(30.41)        | 963<br>(42.27)        | 1410<br>(28.07)       | 1100<br>(22.89)       | 1400<br>(32.56)       | 1650<br>(32.72)       |
| <b>Partnership status</b>                                                             |                        |                       |                       |                       |                       |                       |
| <b>Living with a partner</b>                                                          | 5915<br>(27.58)        | 749<br>(32.88)        | 1290<br>(25.68)       | 1262<br>(26.26)       | 1332<br>(30.98)       | 1282<br>(25.42)       |
| <b>Not living with partner</b>                                                        | 15535<br>(72.42)       | 1529<br>(67.12)       | 3733<br>(74.32)       | 3544<br>(73.74)       | 2968<br>(69.02)       | 3761<br>(74.58)       |
| <b>Education</b>                                                                      |                        |                       |                       |                       |                       |                       |
| <b>&lt; Tertiary education</b>                                                        | 16362<br>(76.37)       | 1805<br>(79.34)       | 3881<br>(77.26)       | 3856<br>(80.23)       | 3175<br>(74.06)       | 3645<br>(72.41)       |
| <b>≥Tertiary education (attended vocational training OR higher form of education)</b> | 5063<br>(23.63)        | 470<br>(20.66)        | 1142<br>(22.73)       | 950<br>(19.76)        | 1112<br>(25.94)       | 1389<br>(27.59)       |

234

### 235 **Prevention Package Coverage Analysis (objective 3)**

236 Fig 3 represents the coverage of both the basic and extended definitions of the PP  
237 amongst Ukrainian FSW from 2009 to 2017. For both definitions of access to prevention,  
238 coverage increased from 2009, peaked in 2013 and then decreased in 2015 and 2017. The  
239 highest proportion of FSWs who had access to the PP was in 2013, where 51.46% and  
240 67.42% accessed the basic and extended PP, respectively, whereas the lowest level of  
241 coverage was seen in 2017 with only 26.71% received the basic and 32.10% the extended  
242 PP, respectively. Between 48.4% and 54.09% of Ukrainian FSW received HIV testing  
243 between 2009 and 2015, however, this drastically decreased in 2017 with only 27.92%  
244 coverage. Condom coverage presented a similar trend, as between 52.85% and 65.36% of  
245 FSW received condoms from 2009 to 2015, yet only 46.72% in 2017.

246

247 **Fig 3. Coverage of the basic and extended PP in FSW in the Ukraine between 2009 and**  
248 **2017.**

### 249 **Descriptive Longitudinal Group Comparison (objective 4)**

250 When stratified by receipt and non-receipt of the basic and extended PP, our  
251 descriptive longitudinal group comparison found only marginal differences and therefore, only  
252 results for the basic PP are shown and discussed. Results for the extended PP are available  
253 in the table in S6 S Table. Additionally, due to the volume of data, only results from the  
254 descriptive longitudinal group comparison that (i) showed a clear difference between those  
255 that did access the basic PP compared to those that did not or (ii) were frequently discussed  
256 in the literature as being critical, are explicitly described in our results. For some thematic  
257 clusters, no suitable variables were found in the IBBS datasets; for these clusters, we could  
258 not conduct further analysis.

259 In relation to the factors that operate on a *macrostructural level*, our descriptive comparison  
260 produced mixed results. Amongst the individual-level proxies that we used for representing  
261 macrostructural relationships, the belief that HIV testing was not personally available, was  
262 less common amongst PP recipients compared to PP non-recipients in all years. In all years  
263 except 2009, of the FSWs who believed that HIV testing was not personally available, fear of  
264 HIV status being exposed and no desire to know HIV test results, two individual-level proxies  
265 addressing the level of HIV stigma amongst the population, were less common amongst the  
266 PP recipients. In all years except 2011, belief that HIV prevention is too expensive, the  
267 individual-level proxy referring to the national financial scheme for HIV prevention, was less  
268 common amongst the PP recipients compared to the PP non-recipients. In 2009 and 2011,  
269 dissatisfaction with HCF staff attitude and the opening hours of HCFs, two individual-level  
270 proxies addressing health-related policy, were more common amongst PP recipients. In all  
271 years, sex work as the sole form of income, the individual-level proxy used to address  
272 support schemas for women (re)-entering the workforce, was consistently more common  
273 amongst PP recipients than PP non-recipients.

274 Factors that operate on both the *community organisational level* and the *work environment*  
275 *level* identified consistent differences across all years between PP recipients and PP non-  
276 recipients. The proportion of FSWs, who were clients of an NGO was much larger in PP  
277 recipients (83-97%) than in PP non-recipients (15-25%). Across all years, soliciting on the  
278 street and on highways was more common amongst PP recipients, whereas soliciting in  
279 affluent settings was less common. Of those who experienced GBV, PP recipients were  
280 consistently more affected. Of these FSWs, GBV from clients or police officers was more  
281 common amongst the PP recipients than the PP non-recipients.

282 Regarding factors that operate on the *interpersonal dynamic level*, having sex without a  
283 condom was less common, while having a partner that knew of their FSW status was more  
284 common amongst PP recipients compared to PP non-recipients in all years.

285 Analyses of the factors that operate on a *sex worker individual level* showed that sharing  
286 needles was more common amongst PP recipients, except in 2011. PP recipients were in  
287 2009, 2011 and 2013 on average one year – and in 2015 and 2017, two years older than  
288 their counterparts. Both groups increased in age over time, from 28 to 32 and 27 to 29 years  
289 amongst PP recipients and PP non-recipients, respectively. Knowledge of HIV transmission  
290 routes and knowledge of where to access prevention was consistently higher amongst PP  
291 recipients compared to non-recipients.

**Table 3: Barriers and facilitators to accessing HIV prevention stratified by receipt or non-receipt of basic PP between 2009 and 2017**

|                                                                  |                           | 2009 (%)                 | 2011 (%)                 | 2013 (%)                | 2015 (%)                | 2017 (%)                |
|------------------------------------------------------------------|---------------------------|--------------------------|--------------------------|-------------------------|-------------------------|-------------------------|
| <b>Macrostructural</b>                                           |                           |                          |                          |                         |                         |                         |
| <b>Socio-cultural</b>                                            |                           |                          |                          |                         |                         |                         |
| <i>Level of HIV stigma amongst the population</i>                |                           |                          |                          |                         |                         |                         |
| Belief that HIV testing is personally not available              | Received                  | 0.44                     | 0.32                     | 0.20                    | 0.34                    | 24.05                   |
|                                                                  | Not Received              | 9.28                     | 8.37                     | 5.19                    | 3.78                    | 25.49                   |
| Fear of HIV status being exposed <sup>1</sup>                    | Received <sup>1</sup>     | <b>53.85<sup>1</sup></b> | <b>9.09<sup>1</sup></b>  | -                       | <b>0.05<sup>1</sup></b> | <b>1.19<sup>1</sup></b> |
|                                                                  | Not Received <sup>1</sup> | <b>31.43<sup>1</sup></b> | <b>17.63<sup>1</sup></b> | <b>0.86<sup>1</sup></b> | <b>0.58<sup>1</sup></b> | <b>3.76<sup>1</sup></b> |
| No desire to know HIV test result <sup>1</sup>                   | Received <sup>1</sup>     | 8.70 <sup>1</sup>        | 10.00 <sup>1</sup>       | 0.69 <sup>1</sup>       | -                       | 0.37 <sup>1</sup>       |
|                                                                  | Not Received <sup>1</sup> | 8.23 <sup>1</sup>        | 10.63 <sup>1</sup>       | 1.03 <sup>1</sup>       | 0.18 <sup>1</sup>       | 2.76 <sup>1</sup>       |
| <b>Geographical</b>                                              |                           |                          |                          |                         |                         |                         |
| <i>Location of HIV prevention service centres</i>                |                           |                          |                          |                         |                         |                         |
| Inconvenient location of prevention service centres <sup>1</sup> | Received <sup>1</sup>     | -                        | -                        | 0.04 <sup>1</sup>       | -                       | 0.59 <sup>1</sup>       |
|                                                                  | Not Received <sup>1</sup> | 1.79 <sup>1</sup>        | 4.46 <sup>1</sup>        | 0.51 <sup>1</sup>       | 0.13 <sup>1</sup>       | 1.33 <sup>1</sup>       |
| <i>Migration associated with FSW</i>                             |                           |                          |                          |                         |                         |                         |
| History of travel for FSW purposes                               | Received                  | 21.98                    | 16.28                    | 12.33                   | 7.85                    | 6.98                    |
|                                                                  | Not Received              | 15.50                    | 14.18                    | 16.20                   | 7.52                    | 10.71                   |
| <b>Health-Related Policy</b>                                     |                           |                          |                          |                         |                         |                         |
| <i>Behaviour of health care staff</i>                            |                           |                          |                          |                         |                         |                         |
| Dissatisfaction with staff attitude <sup>1</sup>                 | Received <sup>1</sup>     | <b>7.69<sup>1</sup></b>  | <b>18.18<sup>1</sup></b> | -                       | -                       | <b>0.15<sup>1</sup></b> |
|                                                                  | Not Received <sup>1</sup> | <b>3.57<sup>1</sup></b>  | <b>7.59<sup>1</sup></b>  | <b>0.30<sup>1</sup></b> | <b>0.18<sup>1</sup></b> | <b>0.19<sup>1</sup></b> |
| <i>Functional hours of health care facility</i>                  |                           |                          |                          |                         |                         |                         |
| Inappropriate opening hours <sup>1</sup>                         | Received <sup>1</sup>     | <b>7.69<sup>1</sup></b>  | <b>18.18<sup>1</sup></b> | <b>0.08<sup>1</sup></b> | -                       | <b>1.19<sup>1</sup></b> |
|                                                                  | Not Received <sup>1</sup> | <b>2.14<sup>1</sup></b>  | <b>6.25<sup>1</sup></b>  | <b>0.47<sup>1</sup></b> | <b>0.09<sup>1</sup></b> | <b>0.73<sup>1</sup></b> |
| <b>Economic</b>                                                  |                           |                          |                          |                         |                         |                         |
| <i>National financial scheme for HIV prevention</i>              |                           |                          |                          |                         |                         |                         |
| Belief that HIV prevention is too costly <sup>1</sup>            | Received <sup>1</sup>     | <b>7.69<sup>1</sup></b>  | <b>18.18<sup>1</sup></b> | -                       | <b>1.61<sup>1</sup></b> | <b>0.97<sup>1</sup></b> |
|                                                                  | Not Received <sup>1</sup> | <b>18.57<sup>1</sup></b> | <b>15.62<sup>1</sup></b> | <b>1.11<sup>1</sup></b> | <b>2.80<sup>1</sup></b> | <b>2.57<sup>1</sup></b> |
| <i>National support schemas for women in the workforce</i>       |                           |                          |                          |                         |                         |                         |
| FSW is the sole form of employment                               | Received                  | <b>40.00</b>             | <b>47.45</b>             | <b>41.77</b>            | <b>58.92</b>            | <b>60.73</b>            |
|                                                                  | Not Received              | <b>33.80</b>             | <b>43.01</b>             | <b>39.95</b>            | <b>42.22</b>            | <b>51.52</b>            |
| <b>Community Organisation</b>                                    |                           |                          |                          |                         |                         |                         |
| <b>Sex Worker Collectivisation</b>                               |                           |                          |                          |                         |                         |                         |
| <i>Collective agency of FSW community</i>                        |                           |                          |                          |                         |                         |                         |
| Client of an NGO                                                 | Received                  | <b>82.86</b>             | <b>94.14</b>             | <b>95.51</b>            | <b>97.03</b>            | <b>94.43</b>            |
|                                                                  | Not Received              | <b>14.69</b>             | <b>20.49</b>             | <b>24.82</b>            | <b>25.18</b>            | <b>15.21</b>            |
| <b>Work Environment</b>                                          |                           |                          |                          |                         |                         |                         |
| <b>Physical</b>                                                  |                           |                          |                          |                         |                         |                         |

|                                                                  |                           | 2009 (%)          | 2011 (%)                 | 2013 (%)                | 2015 (%)                | 2017 (%)                |
|------------------------------------------------------------------|---------------------------|-------------------|--------------------------|-------------------------|-------------------------|-------------------------|
| <i>Soliciting setting</i>                                        |                           |                   |                          |                         |                         |                         |
| Street                                                           | Received                  | <b>23.30</b>      | <b>27.33</b>             | <b>15.17</b>            | <b>15.29</b>            | <b>17.45</b>            |
|                                                                  | Not Received              | <b>10.96</b>      | <b>17.46</b>             | <b>14.81</b>            | <b>10.94</b>            | <b>8.82</b>             |
| Highway                                                          | Received                  | <b>35.05</b>      | <b>22.69</b>             | <b>28.43</b>            | <b>26.27</b>            | <b>19.75</b>            |
|                                                                  | Not Received              | <b>20.98</b>      | <b>17.64</b>             | <b>19.07</b>            | <b>16.18</b>            | <b>8.33</b>             |
| Hotel                                                            | Received                  | 4.95              | 4.29                     | 3.81                    | 2.92                    | 4.53                    |
|                                                                  | Not Received              | 6.80              | 3.49                     | 3.14                    | 2.58                    | 6.30                    |
| Affluent settings (e.g. cafes, bars, modelling agencies)         | Received                  | <b>10.66</b>      | <b>13.62</b>             | <b>11.27</b>            | <b>12.37</b>            | <b>10.62</b>            |
|                                                                  | Not Received              | <b>22.81</b>      | <b>17.36</b>             | <b>18.68</b>            | <b>16.90</b>            | <b>20.05</b>            |
| <i>Social</i>                                                    |                           |                   |                          |                         |                         |                         |
| <i>Gender-based violence at workplace</i>                        |                           |                   |                          |                         |                         |                         |
| History of gender violence whilst providing sexual services      | Received                  | -                 | <b>51.24</b>             | <b>51.44</b>            | <b>52.34</b>            | <b>43.06</b>            |
|                                                                  | Not Received              | -                 | <b>41.84</b>             | <b>47.54</b>            | <b>37.68</b>            | <b>38.39</b>            |
| Experience of gender violence from client <sup>2</sup>           | Received <sup>2</sup>     | -                 | 74.91 <sup>2</sup>       | 45.09 <sup>2</sup>      | 43.71 <sup>2</sup>      | 34.00 <sup>2</sup>      |
|                                                                  | Not Received <sup>2</sup> | -                 | 72.74 <sup>2</sup>       | 42.69 <sup>2</sup>      | 30.60 <sup>2</sup>      | 29.95 <sup>2</sup>      |
| Experience of gender violence from a police officer <sup>2</sup> | Received                  | -                 | 32.04 <sup>2</sup>       | 12.94 <sup>2</sup>      | 7.55 <sup>2</sup>       | 7.80 <sup>2</sup>       |
|                                                                  | Not Received              | -                 | 24.96 <sup>2</sup>       | 8.57 <sup>2</sup>       | 5.16 <sup>2</sup>       | 7.66 <sup>2</sup>       |
| <i>Interpersonal dynamic</i>                                     |                           |                   |                          |                         |                         |                         |
| <i>Sex worker- client</i>                                        |                           |                   |                          |                         |                         |                         |
| <i>Condom use</i>                                                |                           |                   |                          |                         |                         |                         |
| Sex without a condom with last client                            | Received                  | <b>4.29</b>       | <b>3.79</b>              | <b>1.78</b>             | <b>4.24</b>             | <b>3.12</b>             |
|                                                                  | Not Received              | <b>13.82</b>      | <b>8.77</b>              | <b>4.50</b>             | <b>8.63</b>             | <b>6.71</b>             |
| Pressure from client to have sex without a condom                | Received                  | 23.08             | 48.81                    | 0.81                    | 1.66                    | 1.63                    |
|                                                                  | Not Received              | 33.86             | 38.62                    | 1.80                    | 4.09                    | 3.30                    |
| <i>Number of clients</i>                                         |                           |                   |                          |                         |                         |                         |
| Number of clients in last 24 hours <sup>+</sup>                  | Received <sup>+</sup>     | 2.26 <sup>+</sup> | 2.24 <sup>+</sup>        | 2.11 <sup>+</sup>       | 1.87 <sup>+</sup>       | 2.42 <sup>+</sup>       |
|                                                                  | Not Received <sup>+</sup> | 1.62 <sup>+</sup> | 1.61 <sup>+</sup>        | 1.88 <sup>+</sup>       | 1.61 <sup>+</sup>       | 2.20 <sup>+</sup>       |
| <i>Sex worker – non-partner</i>                                  |                           |                   |                          |                         |                         |                         |
| <i>Partner's knowledge of occupational status</i>                |                           |                   |                          |                         |                         |                         |
| Partner knowledge of FSW status                                  | Received                  | <b>40.11</b>      | <b>38.39</b>             | <b>17.83</b>            | <b>18.52</b>            | <b>15.81</b>            |
|                                                                  | Not Received              | <b>35.44</b>      | <b>31.43</b>             | <b>12.56</b>            | <b>11.61</b>            | <b>8.33</b>             |
| <i>Gender-based violence</i>                                     |                           |                   |                          |                         |                         |                         |
| Experience of gender violence from intimate partner <sup>2</sup> | Received <sup>2</sup>     | -                 | <b>10.39<sup>2</sup></b> | <b>4.08<sup>2</sup></b> | <b>2.49<sup>2</sup></b> | <b>2.90<sup>2</sup></b> |
|                                                                  | Not Received <sup>2</sup> | -                 | <b>13.71<sup>2</sup></b> | <b>3.51<sup>2</sup></b> | <b>1.69<sup>2</sup></b> | <b>3.17<sup>2</sup></b> |
| <i>Partnership status</i>                                        |                           |                   |                          |                         |                         |                         |
| Living with a partner                                            | Received                  | 35.38             | 28.28                    | 28.55                   | 33.09                   | 30.51                   |
|                                                                  | Not Received              | 31.21             | 23.63                    | 23.83                   | 29.05                   | 23.57                   |
| <i>Sex Worker Individual</i>                                     |                           |                   |                          |                         |                         |                         |
| <i>Behavioural</i>                                               |                           |                   |                          |                         |                         |                         |



|                                                              |                           | 2009 (%)           | 2011 (%)           | 2013 (%)           | 2015 (%)           | 2017 (%)           |
|--------------------------------------------------------------|---------------------------|--------------------|--------------------|--------------------|--------------------|--------------------|
| <i>Knowledge of HIV</i>                                      |                           |                    |                    |                    |                    |                    |
| Knowledge of HIV transmission routes (all questions correct) | Received                  | <b>64.07</b>       | <b>67.88</b>       | <b>60.09</b>       | <b>59.55</b>       | <b>57.76</b>       |
|                                                              | Not Received              | <b>55.63</b>       | <b>51.25</b>       | <b>55.68</b>       | <b>57.38</b>       | <b>50.46</b>       |
| Knowledge of where to access HIV prevention                  | Received                  | <b>98.46</b>       | <b>99.59</b>       | <b>99.51</b>       | <b>99.17</b>       | <b>98.74</b>       |
|                                                              | Not Received              | <b>81.80</b>       | <b>84.78</b>       | <b>90.44</b>       | <b>90.57</b>       | <b>86.42</b>       |
| <i>History of substance abuse</i>                            |                           |                    |                    |                    |                    |                    |
| Drug Injecting                                               |                           |                    |                    |                    |                    |                    |
| History of sharing needles                                   | Received                  | 24.32              | 4.41               | 1.82               | 13.65              | 7.57               |
|                                                              | Not Received              | 14.52              | 19.33              | 1.41               | 5.65               | 5.09               |
| <i>Work life balance</i>                                     |                           |                    |                    |                    |                    |                    |
| Workdays per week <sup>+</sup>                               | Received <sup>+</sup>     | 4.12 <sup>+</sup>  | 4.15 <sup>+</sup>  | 4.37 <sup>+</sup>  | 4.43 <sup>+</sup>  | 4.27 <sup>+</sup>  |
|                                                              | Not Received <sup>+</sup> | 2.97 <sup>+</sup>  | 3.22 <sup>+</sup>  | 4.02 <sup>+</sup>  | 3.77 <sup>+</sup>  | 3.87 <sup>+</sup>  |
| <i>Duration in sex work</i>                                  |                           |                    |                    |                    |                    |                    |
| Age of FSW debut <sup>+</sup>                                | Received <sup>+</sup>     | 20.28 <sup>+</sup> | 21.24 <sup>+</sup> | 21.65 <sup>+</sup> | 21.77 <sup>+</sup> | 23.16 <sup>+</sup> |
|                                                              | Not Received <sup>+</sup> | 20.59 <sup>+</sup> | 21.08 <sup>+</sup> | 21.41 <sup>+</sup> | 21.22 <sup>+</sup> | 22.11 <sup>+</sup> |
| Age of sexual debut <sup>+</sup>                             | Received <sup>+</sup>     | 15.99 <sup>+</sup> | 15.87 <sup>+</sup> | 15.79 <sup>+</sup> | -                  | 16.40 <sup>+</sup> |
|                                                              | Not Received <sup>+</sup> | 15.92 <sup>+</sup> | 15.99 <sup>+</sup> | 15.89 <sup>+</sup> | -                  | 16.17 <sup>+</sup> |
| <i>Level of education</i>                                    |                           |                    |                    |                    |                    |                    |
| Higher education (tertiary education)                        | Received                  | 19.49              | 22.10              | 17.91              | 24.56              | 22.35              |
|                                                              | Not Received              | 21.43              | 23.24              | 21.73              | 27.20              | 29.51              |
| <i>Biological</i>                                            |                           |                    |                    |                    |                    |                    |
| <i>HIV factors</i>                                           |                           |                    |                    |                    |                    |                    |
| HIV positive status                                          | Received                  | 13.75              | 8.57               | 3.80               | 3.17               | 2.08               |
|                                                              | Not Received              | 8.82               | 8.03               | 1.54               | 3.11               | 2.44               |
| <i>STI factors</i>                                           |                           |                    |                    |                    |                    |                    |
| Diagnosis of hepatitis C within the last 12 months           | Received                  | 5.93               | 6.18               | 8.98               | 7.16               | 6.38               |
|                                                              | Not Received              | 4.46               | 4.13               | 4.59               | 4.54               | 3.81               |
| Diagnosis of hepatitis B within the last 12 months           | Received                  | 2.97               | 1.94               | 2.39               | 2.24               | 2.30               |
|                                                              | Not Received              | 1.54               | 1.07               | 1.41               | 1.51               | 2.41               |
| <i>Age</i>                                                   |                           |                    |                    |                    |                    |                    |
| Age <sup>+</sup>                                             | Received <sup>+</sup>     | 27.73 <sup>+</sup> | 28.11 <sup>+</sup> | 28.90 <sup>+</sup> | 29.84 <sup>+</sup> | 31.58 <sup>+</sup> |
|                                                              | Not Received <sup>+</sup> | 27.15 <sup>+</sup> | 27.28 <sup>+</sup> | 28.09 <sup>+</sup> | 27.98 <sup>+</sup> | 28.92 <sup>+</sup> |
| <i>Reproductive status</i>                                   |                           |                    |                    |                    |                    |                    |
| Presence of dependents                                       | Received                  | 51.10              | 60.89              | 43.39              | 44.01              | 46.70              |
|                                                              | Not Received              | 47.44              | 50.36              | 51.95              | 52.98              | 57.90              |
| Number of dependents <sup>+</sup>                            | Received <sup>+</sup>     | 1.94 <sup>+</sup>  | 1.83 <sup>+</sup>  | 1.91 <sup>+</sup>  | 1.03 <sup>+</sup>  | 0.98 <sup>+</sup>  |
|                                                              | Not Received <sup>+</sup> | 1.82 <sup>+</sup>  | 1.79 <sup>+</sup>  | 1.75 <sup>+</sup>  | 0.82 <sup>+</sup>  | 0.59 <sup>+</sup>  |
| <i>Client individual</i>                                     |                           |                    |                    |                    |                    |                    |

|                                                                                                                                                                                                                                                                      |              | 2009 (%) | 2011 (%) | 2013 (%) | 2015 (%) | 2017 (%) |
|----------------------------------------------------------------------------------------------------------------------------------------------------------------------------------------------------------------------------------------------------------------------|--------------|----------|----------|----------|----------|----------|
| <b>Biological</b>                                                                                                                                                                                                                                                    |              |          |          |          |          |          |
| <b>Age</b>                                                                                                                                                                                                                                                           |              |          |          |          |          |          |
| Age ( $\leq$ 35 years)                                                                                                                                                                                                                                               | Received     | 36.92    | 36.58    | 44.22    | 33.95    | 28.80    |
|                                                                                                                                                                                                                                                                      | Not Received | 42.47    | 40.59    | 43.38    | 43.34    | 34.15    |
| Bolded text are variables that are described in the results.<br><sup>1</sup> Sub-question of "I believe that HIV testing is not available for me personally"<br><sup>2</sup> Sub-question of "History of gender violence whilst providing sexual services"<br>+ Mean |              |          |          |          |          |          |

## 293 Discussion

294 In this study, we identified factors that acted as potential barriers and facilitators to the  
295 access of HIV prevention amongst the Ukrainian FSW population between 2009 and 2017.  
296 Our literature-informed conceptual framework identified various risk factor clusters, which  
297 operate on six structural levels. Our exploratory analyses identified that these factors may  
298 have partially been responsible for the changes in PP coverage, which peaked in 2013 and  
299 then dropped in both 2015 and 2017. Our results suggest that sex work as the only form of  
300 income, being a client of an NGO, street and highway solicitation, partner's knowledge of  
301 occupation, knowledge of where to access prevention and knowledge of HIV transmission  
302 routes may act as important facilitators to HIV prevention. Potential barriers to accessing the  
303 PP were soliciting in affluent settings and unsafe sex.

304 The initial conceptual framework reflected the findings from empirical studies, which were  
305 conducted in the Americas, the African, East Mediterranean, European, South-East Asia and  
306 West Pacific regions between 2005 and 2018. To tailor this global conceptual framework to a  
307 Ukrainian setting, we discussed our findings with staff members in the PHC of the Ministry of  
308 Health of Ukraine and subsequently removed one determinant – sex worker family – from the  
309 framework, as it was not applicable to the Ukrainian context. The resulting conceptual  
310 framework, thus, reflects both current, global literature as well as local insights into barriers  
311 and facilitators to accessing PP in Ukraine. This conceptual framework can be utilised to  
312 inform future research on barriers and facilitators of accessing HIV prevention for FSWs and  
313 contribute to advancing theories underlying this field of research.

314 Findings from our document analysis identified that the Ukrainian PP has changed over the  
315 past nine years, which may be attributed to the fluctuation in international funding and the  
316 armed conflict in the east of Ukraine. Between 2008 and 2013, Alliance's international  
317 funding grew from US\$28.4 to US\$37.7 million, which coincided with an expansion in the PP

318 from 10 to 24 components in 2008 and 2013, respectively [27, 32]. Only seven components  
319 were offered in 2014, the year in which Ukraine experienced a severe restructuring of the  
320 political landscape [44], recession of the economy [45] and the onset of the continuing  
321 armed-conflict in the east [46]. As one of the only NGOs permitted to work in the conflict  
322 zones of the east, Alliance diverted a large proportion of international funding to the  
323 emergency procurement of HIV and tuberculosis (TB) medicine in these eastern regions [32,  
324 33]. This diversion of funds may be one factor to explain the sharp decrease in PP  
325 components in regions of Ukraine from 2014 onwards, particularly, specialist medical or legal  
326 counselling. Despite this cutback, the components that were included from 2015 to 2017 did  
327 largely meet the WHO recommendations, which included condoms, HIV testing and  
328 counselling, consultations with social workers as well as screening and prevention of co-  
329 infections such as TB and Hepatitis B [47].

330 The coverage of both the basic and the extended PP also changed over this nine-year  
331 period. Between 2009 and 2013, progress toward the “five pillars for achieving less than  
332 500,000 new infections by 2020”, a sub-target of the 90-90-90 goals seemed promising as  
333 the level of extended PP coverage amongst Ukrainian FSWs increased from 60% to 67%.  
334 However, although Kyiv and other cities signed the Paris Declaration on Fast-Track Cities in  
335 2014, a pact that committed cities to focusing on vulnerable and marginalized people,  
336 including key populations, [22] extended PP coverage dropped to 32% in 2017.  
337 Coincidentally, Alliance introduced a new policy in 2017 that deemed FSWs who knew of  
338 their HIV positive status ineligible for testing [48]. This may explain the steep decline in both  
339 HIV testing coverage and subsequently, the sharp drop in PP coverage in 2017.  
340 Nonetheless, our analyses also identified a 18.05% decrease in condom coverage in 2017,  
341 hence, future research is required to further investigate this trend. Alliance defines receipt of  
342 basic PP as ‘the receipt of at least one male condom and at least one consultation with a  
343 social worker’, however, due to limitations in the IBBS questionnaires, our definition included,

344 'receipt of male condoms and receipt of HIV testing and counselling'. This could explain the  
345 discrepancy between the coverage we observed, and that reported by Alliance. Alliance  
346 report that the basic PP coverage remained relatively stable over time (46.7% in 2013 and  
347 48% in 2017), whereas we identified a clear decrease in basic PP coverage over this time  
348 period (51.46% and 26.71% in 2013 and 2017, respectively). Furthermore, Alliance utilises  
349 an internal database, Syrex for reporting [32] as opposed to the IBBS, which may also  
350 explain this difference in coverage.

351 The fall in coverage between 2013 and 2017 may further be explained by the reduction in  
352 international financial support and the redistribution of resources associated with emergency  
353 programmes in the conflict zone, both of which operate on a *macrostructural level*.

354 Changes in the PP coverage may also be explained by specific factors associated with  
355 access to prevention. Our findings from the *macrostructural level* suggest that relying upon  
356 sex work as one's sole source of income consistently acted as a facilitator to the basic PP.  
357 We identified that the proportion of FSWs relying upon sex work as their only form of income  
358 increased in both groups between 2015 and 2017, which coincides with and could potentially  
359 have arisen because of the outbreak of the armed conflict in the East of Ukraine. This spike  
360 in reliance upon sex work aligns with previous studies that outline the catalytic effect that  
361 armed conflict can have upon internal displacement and economic insecurity, which in turn,  
362 often results in conditions that facilitate engagement in sex work as a source of income,  
363 particularly amongst woman [49-51].

364 We observed a high level of stigma (54%) amongst PP recipients who feared their HIV status  
365 being exposed in 2009, however we did not observe meaningful between-group differences.  
366 Previous studies have deemed stigma to be one of the most salient barriers to HIV  
367 prevention [17, 52, 53], fuelled by other factors on different structural levels such as  
368 criminalisation [15, 54-56] on the *macrostructural level* and a lack of community  
369 empowerment on the *community organisational level* [17, 57, 58].

370 Our results identified an encouraging trend underscoring the importance of facilitators that  
371 operate on a *community organisation level*. In congruence with previous literature [17, 57-  
372 59], our findings strongly imply that collective agency of the Ukrainian FSW community via  
373 NGO membership largely facilitated access to the basic PP, as most PP recipients were  
374 clients of an NGO. Knowledge of HIV transmission routes was higher amongst PP recipients  
375 across all years, which may be attributable to consultations with social workers and the  
376 distribution of HIV awareness-raising materials, two components that were consistently  
377 included in the PP. Authors have also identified that social and community participation can  
378 foster transparency and trust between FSWs and non-FSWs, which can increase their  
379 access to prevention [39, 60]. Our results support this in all years, as disclosing one's FSW  
380 status to a partner was more common amongst PP recipients, suggesting that this may have  
381 acted as a facilitator.

382 Our results from the *interpersonal dynamic* and the *work environment level* not only elucidate  
383 potential barriers and facilitators to PP in the Ukrainian context but highlight the interplay of  
384 factors that operate on different structural levels. We found condom use to be consistently  
385 more common amongst PP recipients than PP non-recipients, this may suggest that sex  
386 without a condom could act as a barrier to the PP. An array of studies have identified that  
387 unsafe sex is associated with GBV, a factor operating on both the *work environment* and the  
388 *interpersonal dynamic level*. Authors have described that FSWs who have experienced GBV  
389 in the work environment are less likely to instigate condom negotiation in fear of client  
390 aggression [61-66] and therefore, may be less inclined to seek condoms, an important  
391 component of the Ukrainian PP. We identified an alarmingly high prevalence of GBV  
392 amongst both groups at the *work environment*, however, contrary to the literature, GBV at  
393 the *work environment level* was more common amongst PP recipients than PP non-  
394 recipients. Results measuring GBV at the *interpersonal level* were not meaningful. It is  
395 possible that the criminalisation of sex work, a barrier that operates on the *macrostructural*

396 *level*, may have led to an increase in GBV [65, 67, 68] in the workplace, and in turn, an  
397 increase in unsafe sex [69]. Although recent literature supports this hypothesis [15, 55, 70],  
398 future research is required to further explore this within the Ukrainian context. Further  
399 research is particularly warranted to investigate the higher prevalence of GBV amongst PP  
400 recipients and this association with condom use.

401 Two additional factors on the *work environment level*, street- and highway-based soliciting  
402 appeared to act as facilitators to the basic PP in all years. This contrasted with previous  
403 literature, which has highlighted that street-based FSWs are less likely to access HIV  
404 prevention due to an array of barriers, such as higher mobility, higher risk-taking behaviour  
405 and higher exposure to GBV [9, 61, 71, 72]. The facilitating effect that street- and highway  
406 soliciting had upon access to the PP in the Ukrainian context may be attributed to the  
407 successful employment of mobile clinics, an intervention conducted by Alliance to ease  
408 access to HIV prevention services, specifically targeting these vulnerable subgroups [34].  
409 Affluent-based FSWs may be less likely to disclose their HIV status due to fear of being  
410 associated with HIV and being banned from a venue, resulting in loss of income [21, 39, 73,  
411 74]. Furthermore, affluent-based FSWs may be less interested in accessing the basic PP, as  
412 they are able to afford these services. This warrants future qualitative research to investigate  
413 the prevention needs of Ukrainian FSWs, relative to their soliciting setting.

414 Our findings from the *sex worker individual level* corroborate previous studies, which have  
415 demonstrated that knowledge of where to access prevention acts as a key facilitator [9, 39,  
416 56, 57, 59, 75]. However, contrary to our expectations, we found that more than 82% of  
417 Ukrainian FSWs who did *not* access the basic PP *knew* where to access prevention. This  
418 may suggest the need to further address macrostructural barriers in efforts to ameliorate  
419 access to HIV prevention.

420 Although our study provides valuable insights into the factors associated with access HIV  
421 prevention, future research is needed to deepen this knowledge. Our analyses were limited

422 by the quality of the data and further quantitative analyses, both in Ukrainian but also in other  
423 specific and broader contexts, should focus on collecting high-quality and valid data to  
424 address both specific associations, as well as more complex, multi-component associations.  
425 Qualitative research could provide evidence on opinions, perceptions and motivations of  
426 FSWs, which may help to gain a deeper insight into the source of barriers such as stigma,  
427 GBV and the influence of the armed conflict upon access to HIV in a Ukrainian context.  
428 Future qualitative studies exploring the specific needs of FSWs, namely, which PP  
429 components are most necessary, may also elucidate important findings for future prevention  
430 programmes.

431

## 432 **Strengths and Limitations**

433 The strength of this work lies in its theoretical foundation in current empirical literature  
434 and the use of a conceptual framework to inform the analyses. Using a conceptual  
435 framework is not only considered a means of conceptualizing and structuring research, it  
436 also contributes to theory building around the topic of interest. Our conceptual framework  
437 informed the selection of variables in the survey, hence contributing to the structure of the  
438 exploratory analyses. Additionally, the use of multiple, large datasets from FSWs in almost all  
439 regions of Ukraine allowed us to explore changes over time, another major strength of this  
440 study.

441 Several limitations need to be taken into account when interpreting these results. Firstly, we  
442 limited our literature searches to one database, PubMed. Our search strategy did not focus  
443 on identifying conceptual papers that presented and discussed theories, models or  
444 frameworks of barriers and facilitators but empirical papers assessing barriers and facilitators  
445 in real-world settings. There were also limitations with regard to the assessed IBBS surveys.  
446 Changes in the design of surveys made it difficult to compare particular factors across time,



447 particularly questions measuring barriers on the *macrostructural level*. Additionally, missing  
448 data prevented us from measuring informative outcomes, such as the coverage of the basic  
449 PP, as defined by Alliance. The nature of the questions themselves may have also  
450 influenced results; both FSW and HIV are two highly sensitive issues and therefore, recall  
451 and social desirability bias may have impacted the responses in the survey, particularly since  
452 the survey were administered face-to-face. There were also limitations in our analyses. In  
453 measuring PP coverage, changes in the specific components of the PP over time resulted in  
454 our indicator for extended PP coverage being more volatile and less informative than the  
455 basic PP. However, a similar trend was seen in both basic and extended PP coverage,  
456 hence this did not substantially impact the measurement of coverage. Nonetheless, the level  
457 of coverage of each PP component may vary based on region and therefore have had some  
458 influence upon our results. Geographical sampling of cities included in the IBBS may have  
459 also influenced the level of coverage. As in other studies that utilised IBBS data [74, 76-78],  
460 we did not weight for sampling and therefore, our results are to be interpreted with this in  
461 account. Only in 2017 and 2015 was a question on gender included in the IBBS and  
462 although only a small proportion of SWs were male or transgender, limitations caused by the  
463 misclassification need to be considered.

464 We conducted and reported descriptive statistical analyses, however, due to limitations in the  
465 data, such as inconsistent response scales and a lack of internal consistency throughout all  
466 five datasets alongside structural changes between 2013 and 2015. Hence, the analyses  
467 should be considered exploratory rather than confirmatory and should be interpreted  
468 cautiously. As the IBBS measured individual behaviours, we were limited to assigning  
469 individual-level proxies analyse factors that influence access to the Ukrainian PP on the  
470 macrostructural level. RDS and TLS have found to be effective sampling methods for  
471 reaching marginalised populations. In accordance with others working with the IBBS data

472 [74, 79], we did not consider survey weights when calculating descriptive statistics, which  
473 may have led to an over-representation of certain subpopulations.

## 474 **Conclusion**

475 To our knowledge, this is the first study to explore the factors associated with the  
476 access of Ukrainian FSW to HIV prevention on a national scale across a time span of nine  
477 years. Our study strengthens current knowledge that access to prevention is complex with  
478 many factors found on multiple levels and that access to prevention has decreased since  
479 2014. We also identified several factors such as relying solely upon sex work for income,  
480 being a client of an NGO, knowledge of HIV, partner's knowledge of occupation, soliciting  
481 setting and condom use that may be associated with access to HIV prevention within the  
482 Ukrainian context. Future interventions targeting these factors may increase the coverage of  
483 HIV prevention and thus, contribute to reducing the HIV burden within the FSW population.

## 484 **Acknowledgments**

485 The paper summarizes and analyses the data from studies funded by of the Global  
486 Fund to Fight AIDS, Tuberculosis and Malaria (TGF) and implemented in Ukraine by the  
487 International Charitable Foundation "Alliance for Public Health" (Alliance). The data for  
488 analysis were provided to the authors by the data holder the Public Health Centre (PHC) of  
489 the Ukrainian Ministry of Health. All opinions presented in this manuscript belong to the  
490 authors alone and not represent position of the Global Fund to Fight AIDS, Tuberculosis and  
491 Malaria, Alliance for Public Health or the Public Health Centre (PHC) of the Ukrainian  
492 Ministry of Health We would like to thank Ihor Kuzin (PHC), Yana Sazonova (Alliance),  
493 Roksolana Kulchynska (CDC) and Tetyana Salyuk (Alliance) for their comments on the  
494 manuscript, , Oleksandr Korotych (PHC) and Oksana Kovtun (Alliance) for providing us with

495 the IBBS datasets and, Nadiya Yanhol (Alliance) for her insight into the PP. . Lastly and most  
496 importantly, thank you to the SWs that partook in the IBBS studies.

## 497 **Author contributions**

498 Conceptualisation: NB, JB, LMF

499 Formal analysis: NB, JB

500 Methodology: JB, LMF, NB

501 Supervision: JB, LMF

502 Visualisation: NB

503 Writing- original draft: NB

504 Writing- review and editing: NB, JB, LMF

## 505 References

- 506 1. European Centre for Disease Prevention and Control/WHO Regional Office for  
507 Europe. HIV/AIDS surveillance in Europe 2017 - 2016 data. Stockholm; 2017.
- 508 2. Tokar A, Sazonova I, Mishra S, et al. HIV testing behaviour and HIV prevalence  
509 among female sex workers in Ukraine: findings from an Integrated Bio-Behavioural Survey,  
510 2013–2014. *Sexually Transmitted Infections*. 2019;95(3):193-200.
- 511 3. ICF "Alliance For Public Health". Захворюваність на ВІЛ серед ключових груп.  
512 2018.
- 513 4. World Health Organisation. Consolidated Guidelines on HIV prevention, diagnosis,  
514 treatment and care for key populations. WHO Library Cataloguing-in-Publication data.  
515 2014:p2-11.
- 516 5. Shannon K, Crago AL, Baral SD, et al. The global response and unmet actions for  
517 HIV and sex workers. *Lancet*. 2018;392(10148):698-710.
- 518 6. Baral S, Beyrer C, Muessig K, et al. Burden of HIV among female sex workers in low-  
519 income and middle-income countries: a systematic review and meta-analysis. *Lancet Infect*  
520 *Dis*. 2012;12(7):538-49.
- 521 7. World Health Organisation. Chapter 2: Addressing violence against sex workers.  
522 Implementing comprehensive HIV/ STI programmes with sex workers: practical approaches  
523 from collaborative interventions. Geneva2013.
- 524 8. Prakash R, Bhattacharjee P, Blanchard A, et al. Effects of exposure to an intensive  
525 HIV-prevention programme on behavioural changes among female sex workers in Nairobi,  
526 Kenya. *Afr J AIDS Res*. 2018;17(2):99-108.
- 527 9. Huang W, Operario D, Dong Y, et al. HIV-related risk among female migrants working  
528 in entertainment venues in China. *Prev Sci*. 2014;15(3):329-39.
- 529 10. Cange CW, LeBreton M, Saylor K, et al. Female sex workers' empowerment  
530 strategies amid HIV-related socioeconomic vulnerabilities in Cameroon. *Cult Health Sex*.  
531 2017;19(10):1053-65.
- 532 11. Beyrer C, Crago A-L, Bekker L-G, et al. An action agenda for HIV and sex workers.  
533 *The Lancet*. 2015;385(9964):287-301.
- 534 12. Shannon K, Strathdee SA, Shoveller J, Rusch M, Kerr T, Tyndall MW. Structural and  
535 environmental barriers to condom use negotiation with clients among female sex workers:  
536 implications for HIV-prevention strategies and policy. *Am J Public Health*. 2009;99(4):659-65.
- 537 13. Shannon K, Strathdee SA, Goldenberg SM, et al. Global epidemiology of HIV among  
538 female sex workers: influence of structural determinants. *The Lancet*. 2015;385(9962):55-71.
- 539 14. Shannon K, Goldenberg SM, Deering KN, Strathdee SA. HIV infection among female  
540 sex workers in concentrated and high prevalence epidemics: why a structural determinants  
541 framework is needed. *Curr Opin HIV AIDS*. 2014;9(2):174-82.
- 542 15. Maher L, Dixon T, Phlong P, Mooney-Somers J, Stein E, Page K. Conflicting Rights:  
543 How the Prohibition of Human Trafficking and Sexual Exploitation Infringes the Right to  
544 Health of Female Sex Workers in Phnom Penh, Cambodia. *Health Hum Rights*.  
545 2015;17(1):E102-13.

- 546 16. Lazarus L, Deering KN, Nabess R, Gibson K, Tyndall MW, Shannon K. Occupational  
547 stigma as a primary barrier to health care for street-based sex workers in Canada. *Cult*  
548 *Health Sex.* 2012;14(2):139-50.
- 549 17. Biradavolu MR, Blankenship KM, Jena A, Dhungana N. Structural stigma, sex work  
550 and HIV: contradictions and lessons learnt from a community-led structural intervention in  
551 southern India. *J Epidemiol Community Health.* 2012;66 Suppl 2:ii95-9.
- 552 18. Strathdee SA, West BS, Reed E, Moazen B, Azim T, Dolan K. Substance Use and  
553 HIV Among Female Sex Workers and Female Prisoners: Risk Environments and Implications  
554 for Prevention, Treatment, and Policies. *J Acquir Immune Defic Syndr.* 2015;69 Suppl  
555 2:S110-7.
- 556 19. Bekker L-G, Beyrer C, Quinn TC. Behavioral and biomedical combination strategies  
557 for HIV prevention. *Cold Spring Harb Perspect Med.* 2012;2(8):a007435.
- 558 20. Krishnaratne S, Hensen B, Cordes J, Enstone J, Hargreaves JR. Interventions to  
559 strengthen the HIV prevention cascade: a systematic review of reviews. *The lancet HIV.*  
560 2016;3(7):e307-e17.
- 561 21. Bekker L-G, Johnson L, Cowan F, et al. Combination HIV prevention for female sex  
562 workers: what is the evidence? *The Lancet.* 2015;385(9962):72-87.
- 563 22. UNAIDS. Prevention gap report. Geneva; 2016.
- 564 23. ICF "Alliance For Public Health". Annual Report 2006. Kyiv; 2006.
- 565 24. ICF "Alliance For Public Health". Annual Report 2016. Kyiv; 2016.
- 566 25. ICF "Alliance For Public Health". Annual Report 2015. Kyiv; 2015.
- 567 26. Das P, Horton R. Bringing sex workers to the centre of the HIV response. *The Lancet.*  
568 2015;385(9962):3-4.
- 569 27. ICF "Alliance For Public Health". Annual Report 2008. Kyiv; 2008.
- 570 28. ICF "Alliance For Public Health". Annual Report 2009. Kyiv; 2009.
- 571 29. ICF "Alliance For Public Health". Annual Report 2010. Kyiv; 2010.
- 572 30. ICF "Alliance For Public Health". Annual Report 2011. Kyiv; 2011.
- 573 31. ICF "Alliance For Public Health". Annual Report 2012. Kyiv; 2012.
- 574 32. ICF "Alliance For Public Health". Annual Report 2013. Kyiv; 2013.
- 575 33. ICF "Alliance For Public Health". Annual Report 2014. Kyiv; 2014.
- 576 34. ICF "Alliance For Public Health". Annual Report 2017. Kyiv; 2017.
- 577 35. ICF "Alliance For Public Health". Annual Report 2004. Kyiv; 2004.
- 578 36. Yanhol N. Kyiv: Alliance of Public Health; 2019.
- 579 37. UNAIDS. Global AIDS Monitoring 2018: indicators for monitoring the 2016 United  
580 Nations Political Declaration on HIV and AIDS. Geneva 2018.
- 581 38. Team RC. R: A language and environment for statistical computing. R Foundation for  
582 Statistical Computing. Vienna, Austria 2017.
- 583 39. Chanda MM, Perez-Brumer AG, Ortblad KF, et al. Barriers and Facilitators to HIV  
584 Testing Among Zambian Female Sex Workers in Three Transit Hubs. *AIDS Patient Care*  
585 *STDS.* 2017;31(7):290-6.

- 586 40. Qiao S, Li X, Zhang C, et al. Psychological fears among low-paid female sex workers  
587 in southwest China and their implications for HIV prevention. *PLoS One*.  
588 2014;9(10):e1111012.
- 589 41. Johnston LG, Bonilla L, Caballero T, et al. Associations of HIV Testing, Sexual Risk  
590 and Access to Prevention Among Female Sex Workers in the Dominican Republic. *AIDS*  
591 *Behav*. 2017;21(8):2362-71.
- 592 42. Langa J, Sousa C, Sidat M, et al. HIV risk perception and behavior among sex  
593 workers in three major urban centers of Mozambique. *PLoS One*. 2014;9(4):e94838.
- 594 43. World Health Organisation. Consolidated guidelines on the use of antiretroviral drugs  
595 for treating and preventing HIV infection: recommendations for a public health approach.  
596 2013.
- 597 44. Shveda Y, Park JH. Ukraine's revolution of dignity: The dynamics of Euromaidan.  
598 *Journal of Eurasian Studies*. 2016;7(1):85-91.
- 599 45. The World Bank Group. Ukraine Country Profile 2019 [Available from:  
600 <https://data.worldbank.org/country/ukraine>].
- 601 46. Holt E. Conflict in Ukraine and a ticking bomb of HIV. *The Lancet HIV*.  
602 2018;5(6):e273-e4.
- 603 47. World Health Organisation. Consolidated guidelines on HIV prevention, diagnosis,  
604 treatment and care for key populations, 2016 update. Geneva; 2017.
- 605 48. Salyuk T. Kyiv: Alliance of Public Health; 2020.
- 606 49. Ferguson A, Shannon K, Butler J, Goldenberg SM. A comprehensive review of  
607 HIV/STI prevention and sexual and reproductive health services among sex Workers in  
608 Conflict-Affected Settings: call for an evidence- and rights-based approach in the  
609 humanitarian response. *Conflict and health*. 2017;11:25.
- 610 50. Cazabat C. A gender perspective on internal displacement. Geneva: Internal  
611 Displacement Monitoring Centre; 2019.
- 612 51. Maclin B, Kelly J, Kabanga J, VanRooyen M. 'They have embraced a different  
613 behaviour': transactional sex and family dynamics in eastern Congo's conflict. *Cult Health*  
614 *Sex*. 2015;17(1):119-31.
- 615 52. Nnko S, Kuringe E, Nyato D, et al. Determinants of access to HIV testing and  
616 counselling services among female sex workers in sub-Saharan Africa: a systematic review.  
617 *BMC Public Health*. 2019;19(1):15.
- 618 53. Duby Z, Nkosi B, Scheibe A, Brown B, Bekker LG. 'Scared of going to the clinic':  
619 Contextualising healthcare access for men who have sex with men, female sex workers and  
620 people who use drugs in two South African cities. *South Afr J HIV Med*. 2018;19(1):701.
- 621 54. Tucker JD, Ren X. Sex worker incarceration in the People's Republic of China. *Sex*  
622 *Transm Infect*. 2008;84(1):34-5; discussion 6.
- 623 55. Shahmanesh M, Wayal S, Andrew G, Patel V, Cowan FM, Hart G. HIV prevention  
624 while the bulldozers roll: exploring the effect of the demolition of Goa's red-light area. *Soc Sci*  
625 *Med*. 2009;69(4):604-12.
- 626 56. Scorgie F, Nakato D, Harper E, et al. 'We are despised in the hospitals': sex workers'  
627 experiences of accessing health care in four African countries. *Cult Health Sex*.  
628 2013;15(4):450-65.

- 629 57. Zeng H, Zhang L, Zhao Y, et al. HIV prevention among street-based sex workers  
630 (SSWs) in Chongqing, China: interviews with SSWs, clients and healthcare providers. *Health*  
631 *Soc Care Community*. 2016;24(6):e173-e80.
- 632 58. Lim RBT, Cheung ONY, Tham DKT, et al. Using qualitative and community-based  
633 engagement approaches to gain access and to develop a culturally appropriate STI  
634 prevention intervention for foreign female entertainment workers in Singapore. *Global Health*.  
635 2018;14(1):36.
- 636 59. Wanyenze RK, Musinguzi G, Kiguli J, et al. "When they know that you are a sex  
637 worker, you will be the last person to be treated": Perceptions and experiences of female sex  
638 workers in accessing HIV services in Uganda. *BMC Int Health Hum Rights*. 2017;17(1):11.
- 639 60. Tucker JD, Peng H, Wang K, et al. Female sex worker social networks and STI/HIV  
640 prevention in South China. *PLoS One*. 2011;6(9):e24816.
- 641 61. Panchanadeswaran S, Johnson SC, Sivaram S, et al. Intimate partner violence is as  
642 important as client violence in increasing street-based female sex workers' vulnerability to  
643 HIV in India. *Int J Drug Policy*. 2008;19(2):106-12.
- 644 62. Erausquin JT, Reed E, Blankenship KM. Police-related experiences and HIV risk  
645 among female sex workers in Andhra Pradesh, India. *J Infect Dis*. 2011;204 Suppl 5:S1223-  
646 8.
- 647 63. Lang DL, Salazar LF, DiClemente RJ, Markosyan K. Gender based violence as a risk  
648 factor for HIV-associated risk behaviors among female sex workers in Armenia. *AIDS Behav*.  
649 2013;17(2):551-8.
- 650 64. Pando MA, Coloccini RS, Reynaga E, et al. Violence as a barrier for HIV prevention  
651 among female sex workers in Argentina. *PLoS One*. 2013;8(1):e54147.
- 652 65. Decker MR, Lyons C, Billong SC, et al. Gender-based violence against female sex  
653 workers in Cameroon: prevalence and associations with sexual HIV risk and access to health  
654 services and justice. *Sex Transm Infect*. 2016;92(8):599-604.
- 655 66. Prakash R, Manthri S, Tayyaba S, et al. Effect of Physical Violence on Sexually  
656 Transmitted Infections and Treatment Seeking Behaviour among Female Sex Workers in  
657 Thane District, Maharashtra, India. *PLoS One*. 2016;11(3):e0150347.
- 658 67. Duff P, Sou J, Chapman J, et al. Poor working conditions and work stress among  
659 Canadian sex workers. *Occup Med (Lond)*. 2017;67(7):515-21.
- 660 68. Reeves A, Steele S, Stuckler D, McKee M, Amato-Gauci A, Semenza JC. National  
661 sex work policy and HIV prevalence among sex workers: an ecological regression analysis of  
662 27 European countries. *Lancet HIV*. 2017;4(3):e134-e40.
- 663 69. Criminal Code of Ukraine, (2018).
- 664 70. Gruskin S, Ferguson L. Government regulation of sex and sexuality: in their own  
665 words. *Reprod Health Matters*. 2009;17(34):108-18.
- 666 71. Jayanna K, Washington RG, Moses S, et al. Assessment of attitudes and practices of  
667 providers of services for individuals at high risk of HIV and sexually transmitted infections in  
668 Karnataka, south India. *Sex Transm Infect*. 2010;86(2):131-5.
- 669 72. Yi H, Mantell JE, Wu R, Lu Z, Zeng J, Wan Y. A profile of HIV risk factors in the  
670 context of sex work environments among migrant female sex workers in Beijing, China.  
671 *Psychol Health Med*. 2010;15(2):172-87.



- 672 73. Munoz J, Adedimeji A, Alawode O. 'They bring AIDS to us and say we give it to them':  
673 Socio-structural context of female sex workers' vulnerability to HIV infection in Ibadan,  
674 Nigeria. SAHARA J. 2010;7(2):52-61.
- 675 74. Tokar A, Sazonova I, Mishra S, et al. HIV testing behaviour and HIV prevalence  
676 among female sex workers in Ukraine: findings from an Integrated Bio-Behavioural Survey,  
677 2013–2014. Sex Transm Infect. 2019;95(3):193-200.
- 678 75. Asadi-Aliabadi M, Abolghasemi J, Rimaz S, Majdzadeh R, Rostami-Maskopae F,  
679 Merghati-Khoei E. Barriers to Health Service Utilization Among Iranian Female Sex Workers:  
680 A Qualitative Study. Journal of Preventive Medicine and Public Health. 2018;51(2):64.
- 681 76. Makarenko I, Ompad DC, Sazonova Y, Saliuk T, DeHovitz J, Gensburg L. Trends in  
682 Injection Risk Behaviors among People Who Inject Drugs and the Impact of Harm Reduction  
683 Programs in Ukraine, 2007–2013. J Urban Health. 2017;94(1):104-14.
- 684 77. Smyrnov P, Williams LD, Korobchuk A, et al. Risk network approaches to locating  
685 undiagnosed HIV cases in Odessa, Ukraine. J Int AIDS Soc. 2018;21(1):e25040.
- 686 78. Iakunchykova OP, Burlaka V. Correlates of HIV and Inconsistent Condom Use  
687 Among Female Sex Workers in Ukraine. AIDS Behav. 2017;21(8):2306-15.
- 688 79. Vitek CR, Čakalo J-I, Kruglov YV, et al. Slowing of the HIV epidemic in Ukraine:  
689 evidence from case reporting and key population surveys, 2005–2012. PLoS One.  
690 2014;9(9):e103657.
- 691



## 692 **Supporting Information Captions**

693 **S1 Appendix. Literature review method, protocol and results S2 Table. Formation of**  
694 **thematic clusters used to populate the conceptual framework**

695 **S3 Table. Categories and specific PP components as extracted from the Alliance**  
696 **General Reports from 2008 to 2017**

697 **S4 Table. PP component and corresponding IBBS item for 2009, 2011, 2013, 2015 and**  
698 **2017**

699 **S5 Table. Independent variables from IBBS and corresponding thematic clusters for**  
700 **2009, 2011, 2013, 2015 and 2017**

701 **S6 Table. Barriers and facilitators to accessing HIV prevention stratified by receipt or**  
702 **non-receipt of extended PP between 2009 and 2017**



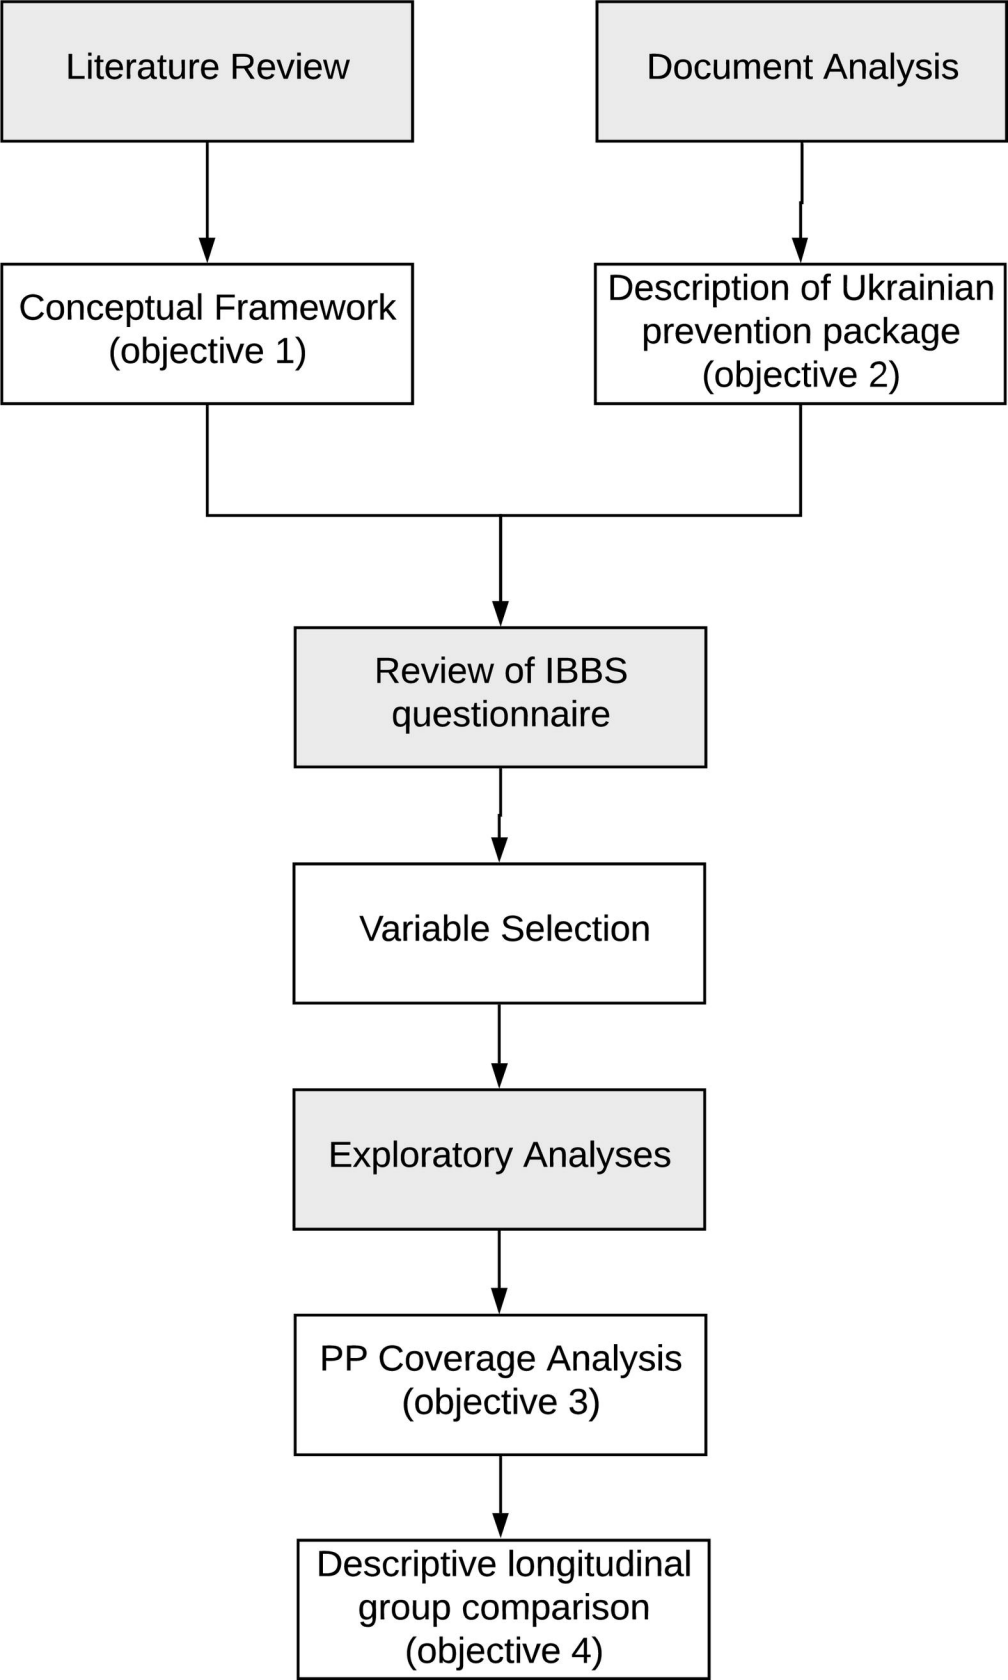

Literature Review

Document Analysis

Conceptual Framework  
(objective 1)

Description of Ukrainian  
prevention package  
(objective 2)

Review of IBBS  
questionnaire

Variable Selection

Exploratory Analyses

PP Coverage Analysis  
(objective 3)

Descriptive longitudinal  
group comparison  
(objective 4)

**Figure 2: Conceptual framework of factors and structural levels influencing access to HIV prevention**

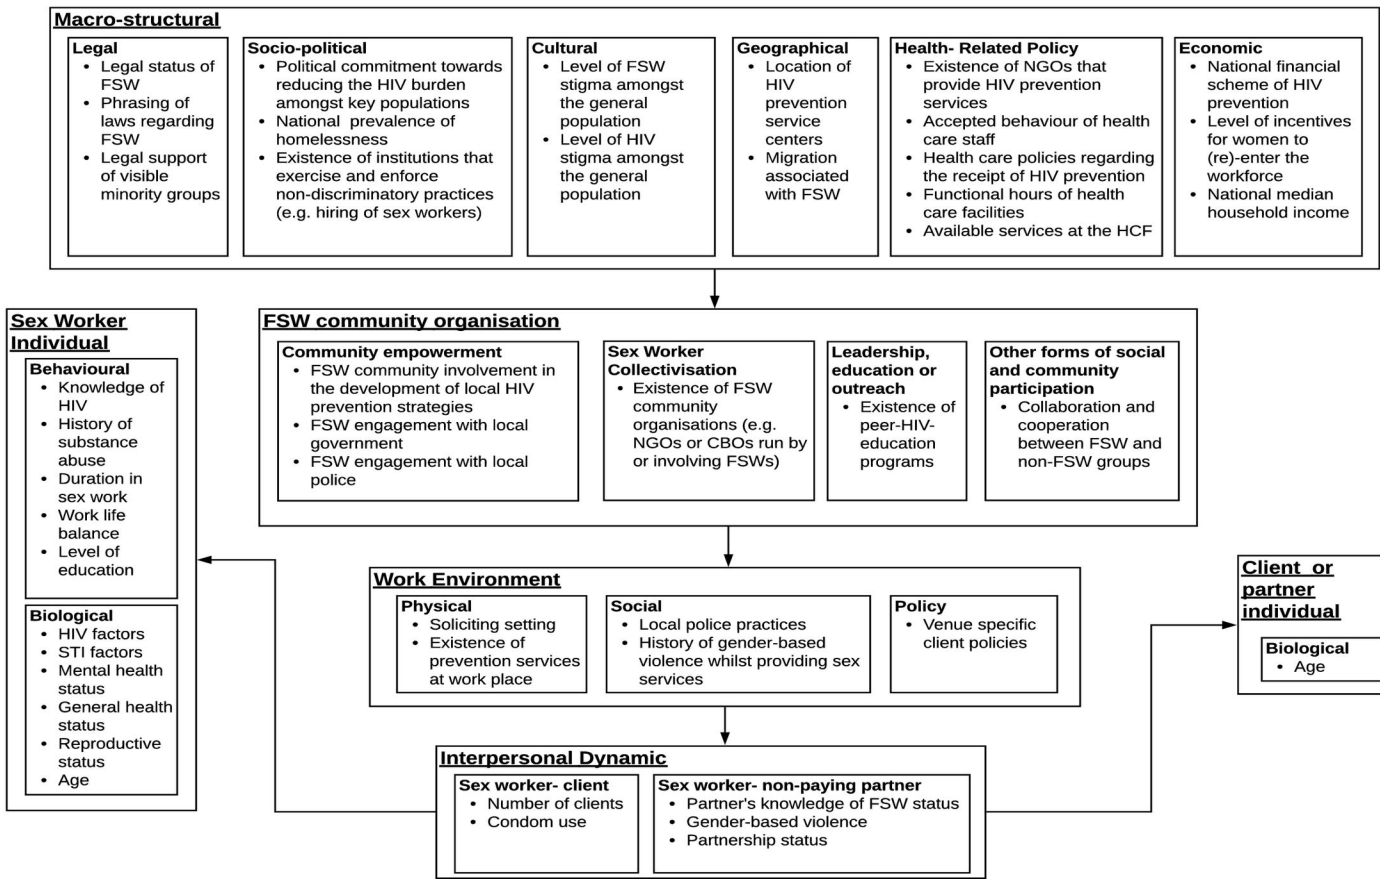

Figure 3: Coverage of the basic and extended PP in FSW in Ukraine between 2009 and 2017

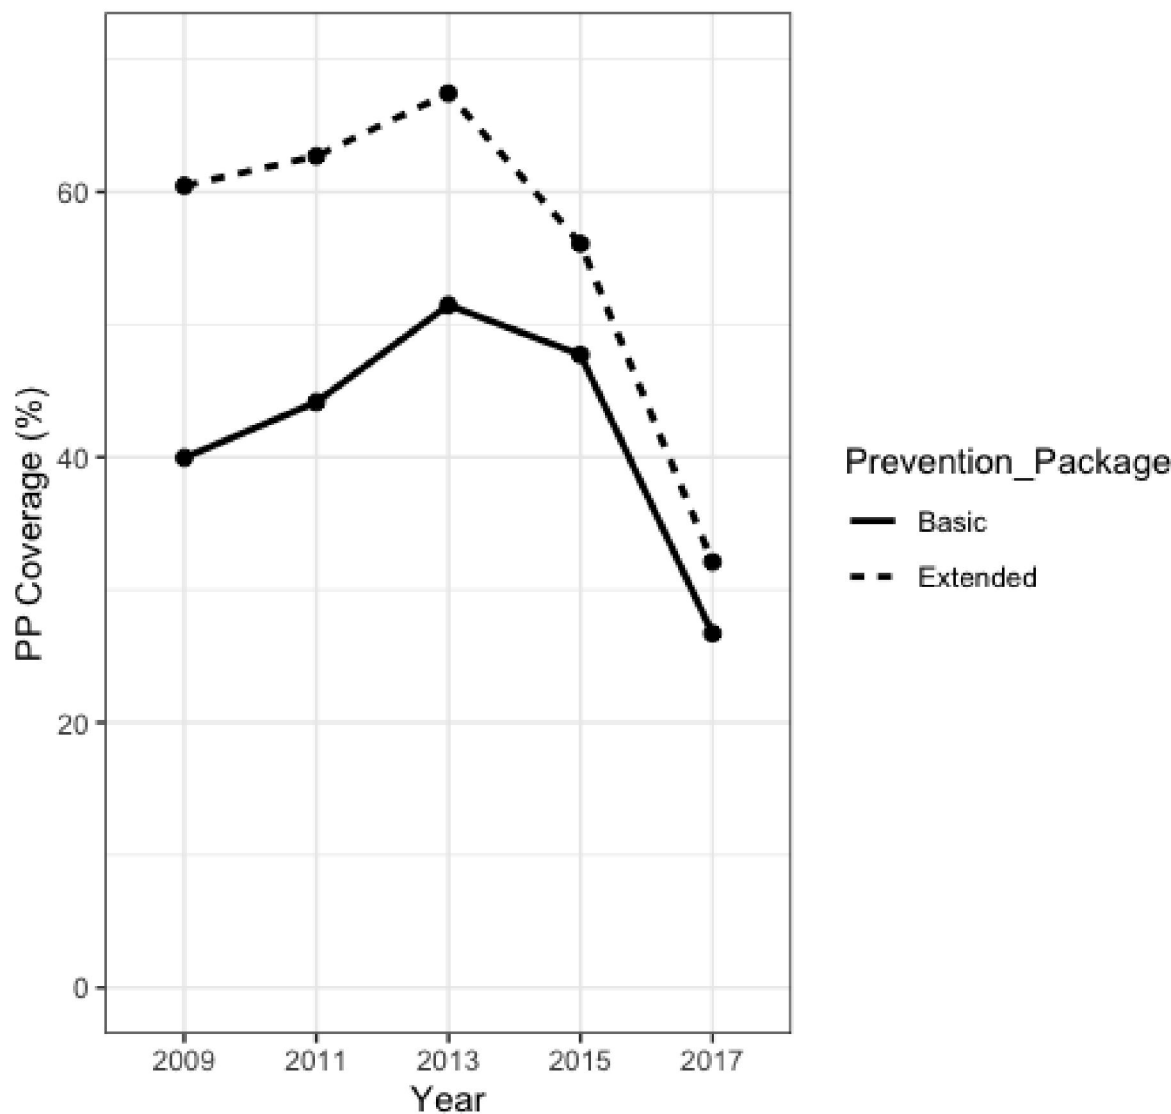

Source: https://medrxiv.org/content/10.1101/2020.07.30.20164954v2.full.pdf
